# Supplementary material
Source: publisher site journal article supplement (https://www.dovepress.com/article/608591)
Supplement: Supplementary file 1 [file 608591%20Revised%20Supplementary%20Material.docx]

**Supplementary Material**

**Supplemental Figures**

**
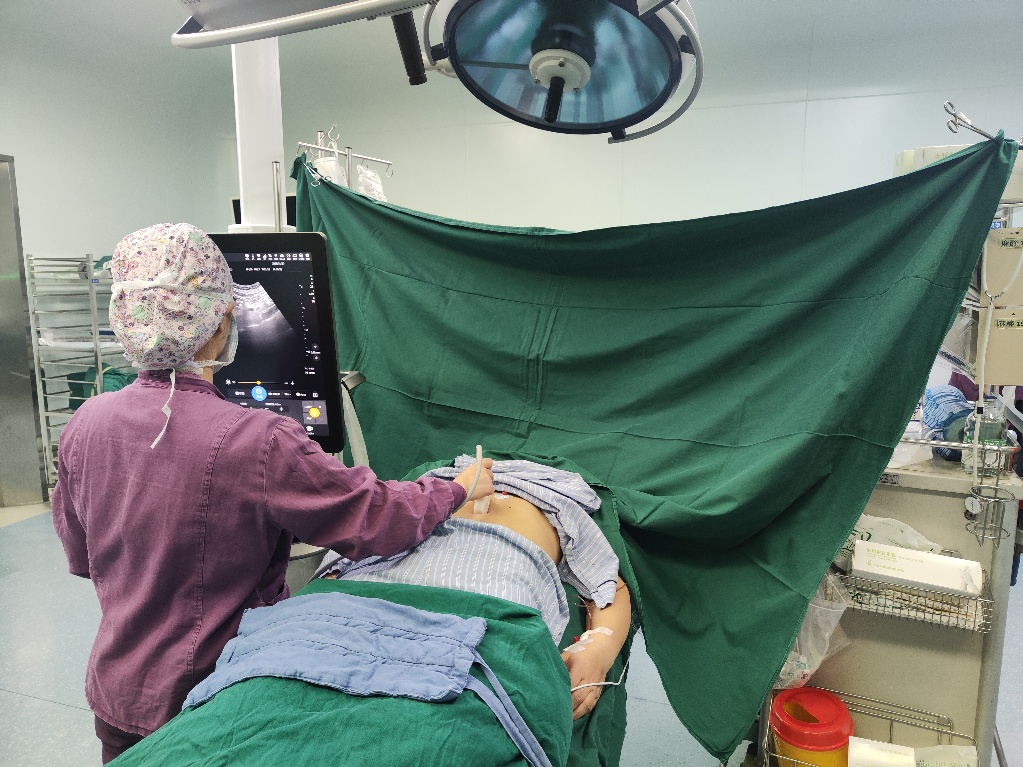
**

**Supplemental Figure S1** Gastric antrum ultrasound examination


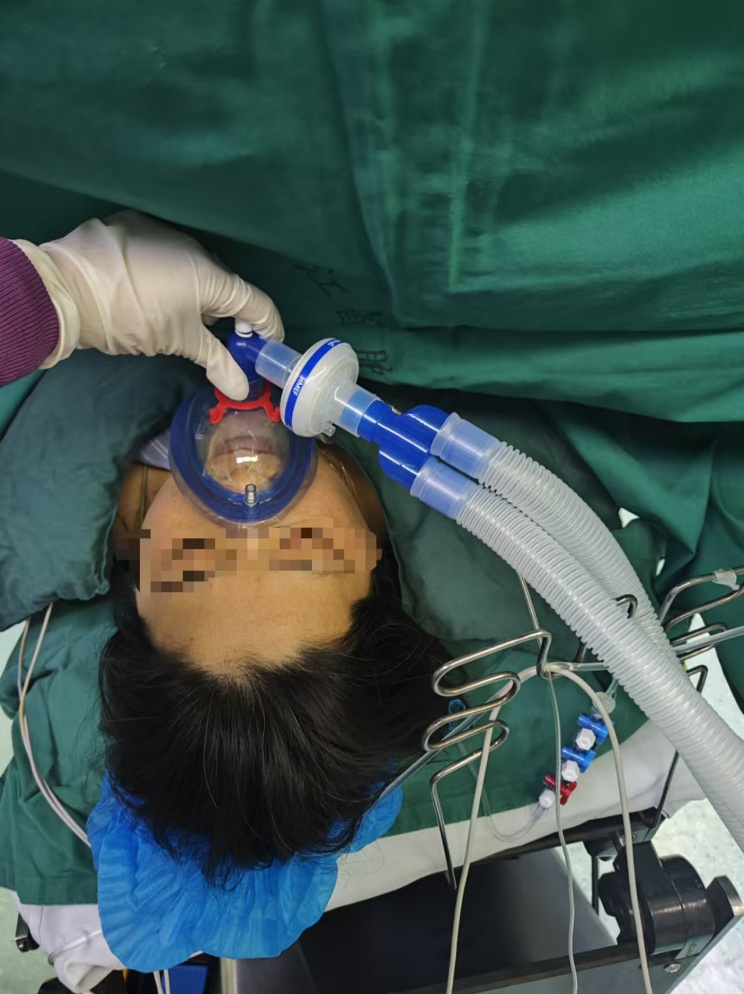


**Supplemental Figure S2** Group M performed pre-oxygenation


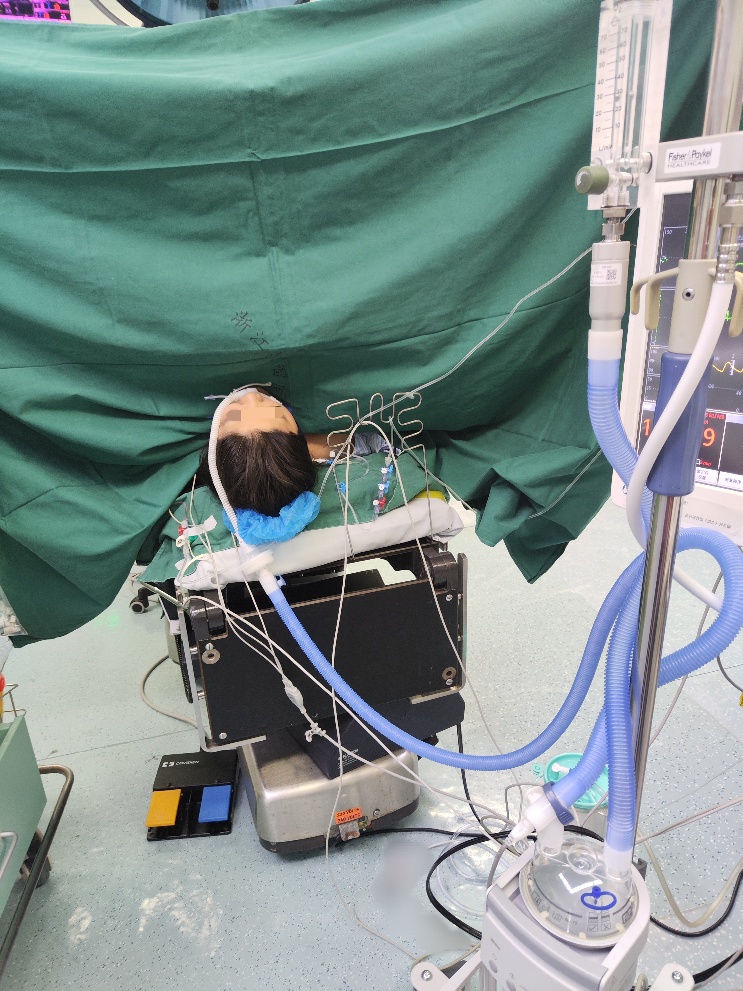


**Supplemental Figure S3** Group T performed pre-oxygenation


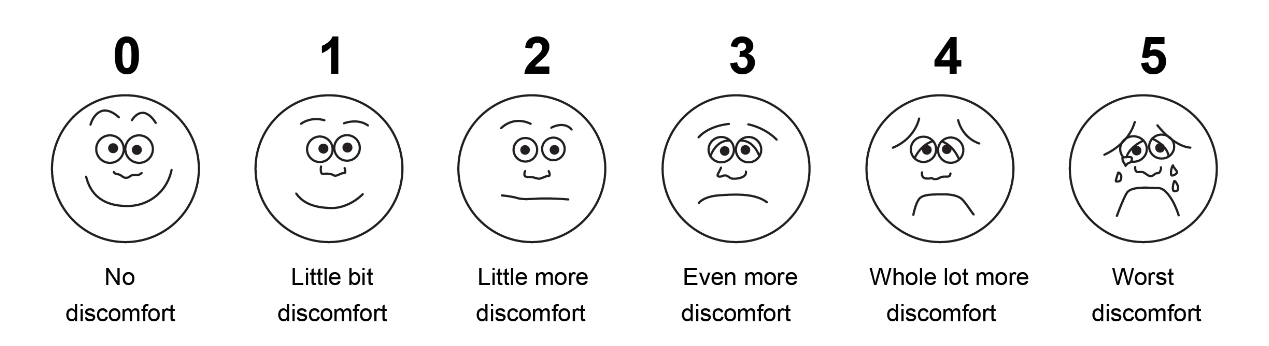


**Supplemental Figure S4** A six-point smiley face scale

**Supplemental Tables**

**Supplemental Table 1** Comparison of CSAa (cm2) in supine position

|  | Group M (*n*=47) | Group T (*n*=47) | *t/U* | *P* |
| --- | --- | --- | --- | --- |
| T1 | 3.87 (1.21) | 4.02 (1.10) | -0.623 | 0.535 |
| T2 | 4.12 (1.17) | 4.18 (1.08) | -0.272 | 0.786 |
| T4 | 4.59 (1.42) | 4.49 (1.18) | 0.360 | 0.720 |
| Percentage increase at T4（%） | 13.24 [3.64–33.48] | 7.62 [2.55–18.55] | 865.000 | 0.070 |
| *F* | *F*=15.676 | *F*=11.899 |  |  |
| *P* | *P*<0.001 | *P*<0.001 |  |  |
| Between-group effect | *F*=0.027，*P*=0.871 | |  |  |
| Within-group effect | *F*=41.446，*P*<0.001 | |  |  |
| interaction effect | *F*=1.744，*P*=0.190 | |  |  |

**Notes:** Data presented as mean (SD), median [IQR]. T1, before pre-oxygenation; T2, after 3 min of pre-oxygenation; T4, immediately after intubation.

**Abbreviations:** CSAa: Cross-sectional area of gastric antrum.

**Supplemental Table 2** Changes in SpO2 and blood gas analysis at different time points

|  | Group M (*n*=47) | Group T (*n*=47) | *t/z* | *P* |
| --- | --- | --- | --- | --- |
| T1SpO2 (%) | 96 [95–97] | 96 [95–97] | -0.073 | 0.942 |
| T2SpO2 (%) | 100 [100–100] | 100 [100–100] | -0.584 | 0.559 |
| T3SpO2 (%) | 100 [100–100] | 100 [100–100] | -3.321 | 0.001 |
| T4SpO2 (%) | 100 [100–100] | 100 [98–100] | -4.815 | <0.001 |
| T1pH | 7.41 (0.02) | 7.41 (0.02) | -0.302 | 0.763 |
| T2pH | 7.39 (0.03) | 7.41 (0.03) | -2.239 | 0.028 |
| T3pH | 7.37 (0.04) | 7.32 (0.02) | 8.193 | <0.001 |
| T4pH | 7.33 (0.03) | 7.30 (0.03) | 5.024 | <0.001 |
| T1*P*aO2 (mmHg) | 78.26 (10.13) | 75.64 (8.87) | 1.332 | 0.186 |
| T2*P*aO2 (mmHg) | 288.83 (63.89) | 354.47 (79.90) | -4.399 | <0.001 |
| T3*P*aO2 (mmHg) | 376.87 (62.65) | 217.74 (99.23) | 9.296 | <0.001 |
| T4*P*aO2 (mmHg) | 309.64 (76.31) | 172.06 (91.33) | 7.925 | <0.001 |
| T1*P*aCO2 (mmHg) | 39.45 (3.97) | 39.51 (3.37) | -0.084 | 0.933 |
| T2*P*aCO2 (mmHg) | 41.28 (3.92) | 38.85 (3.56) | 3.143 | 0.002 |
| T3*P*aCO2 (mmHg) | 45.38 (6.61) | 54.67 (3.68) | -8.418 | <0.001 |
| T4*P*aCO2 (mmHg) | 51.83 (6.09) | 57.64 (3.83) | -5.535 | <0.001 |

**Notes:** Data presented as mean (SD), median [IQR]. T1, before pre-oxygenation; T2, after 3 min of pre-oxygenation; T3, after 3 min of ventilation following induction of unconsciousness by anesthesia; T4, immediately after intubation.

**Supplemental Table 3** The occurrence of adverse reactions

| Adverse reactions | Group M (*n*=47) | Group T (*n*=47) | *P* |
| --- | --- | --- | --- |
| Epistaxis | 0 (0.0%) | 0 (0.0%) | 1.000 |
| Nasopharyngeal discomfort | 2 (4.3%) | 1 (2.1%) | 1.000 |
| Barometric injuries | 0 (0.0%) | 0 (0.0%) | 1.000 |
| Reflux aspiration | 0 (0.0%) | 0 (0.0%) | 1.000 |
| Nausea and vomiting 24h postoperatively | 5 (10.6%) | 5 (10.6%) | 1.000 |

**Notes:** Data presented as *n* (%).

**Supplemental Table 4** Comfort scores

| Comfort scores | Group M（*n*=47） | Group T（*n*=47） | *U* | *P* |
| --- | --- | --- | --- | --- |
| 0/1/2/3/4/5 (scores) | 3/29/15/0/0/0 | 31/10/6/0/0/0 | 458.500 | <0.001 |

**Notes:** Data presented as numbers.
